# Supplementary figures and images for: Text2Protein: A Generative Model for Designated Protein Design on Given Description
Source: Research Square preprint supplement (doi:10.21203/rs.3.rs-4868665/v1), 2024-09-13

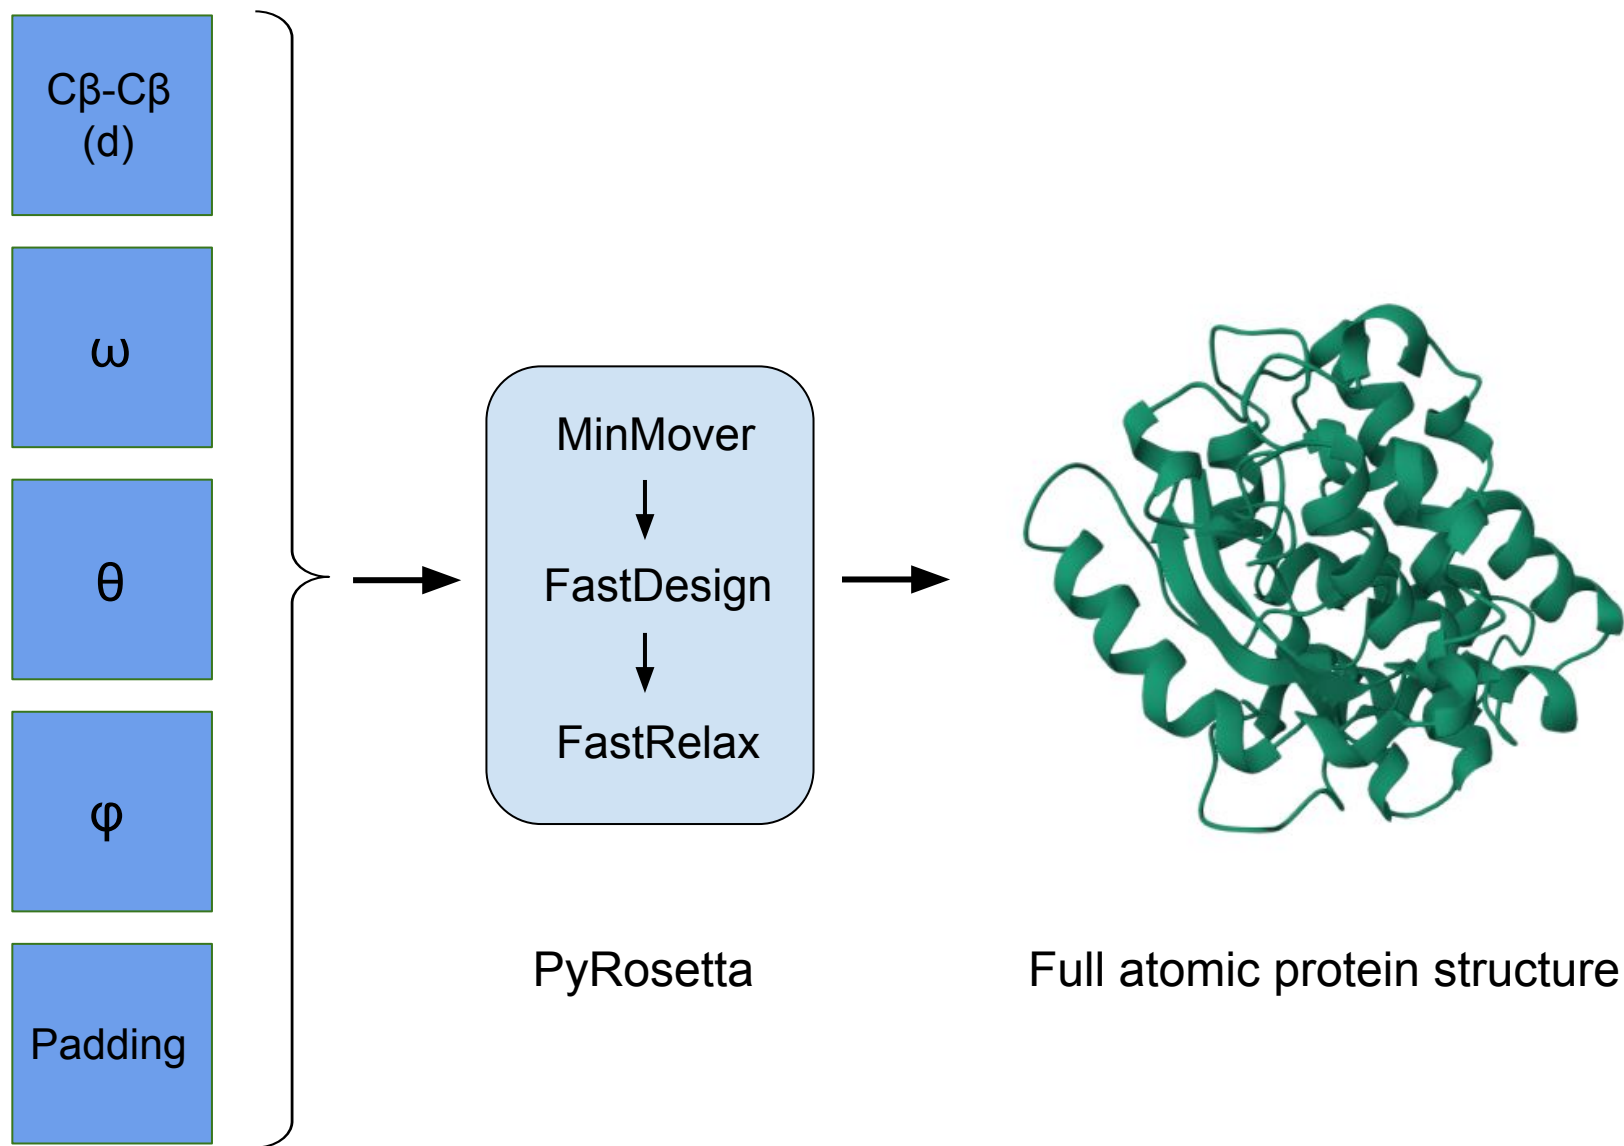

Sampled 6D coordinates

Supplement: Supplementary file 2 [file rosetta_design.pdf › LaTex supplementary files/images/rosetta_design.pdf]

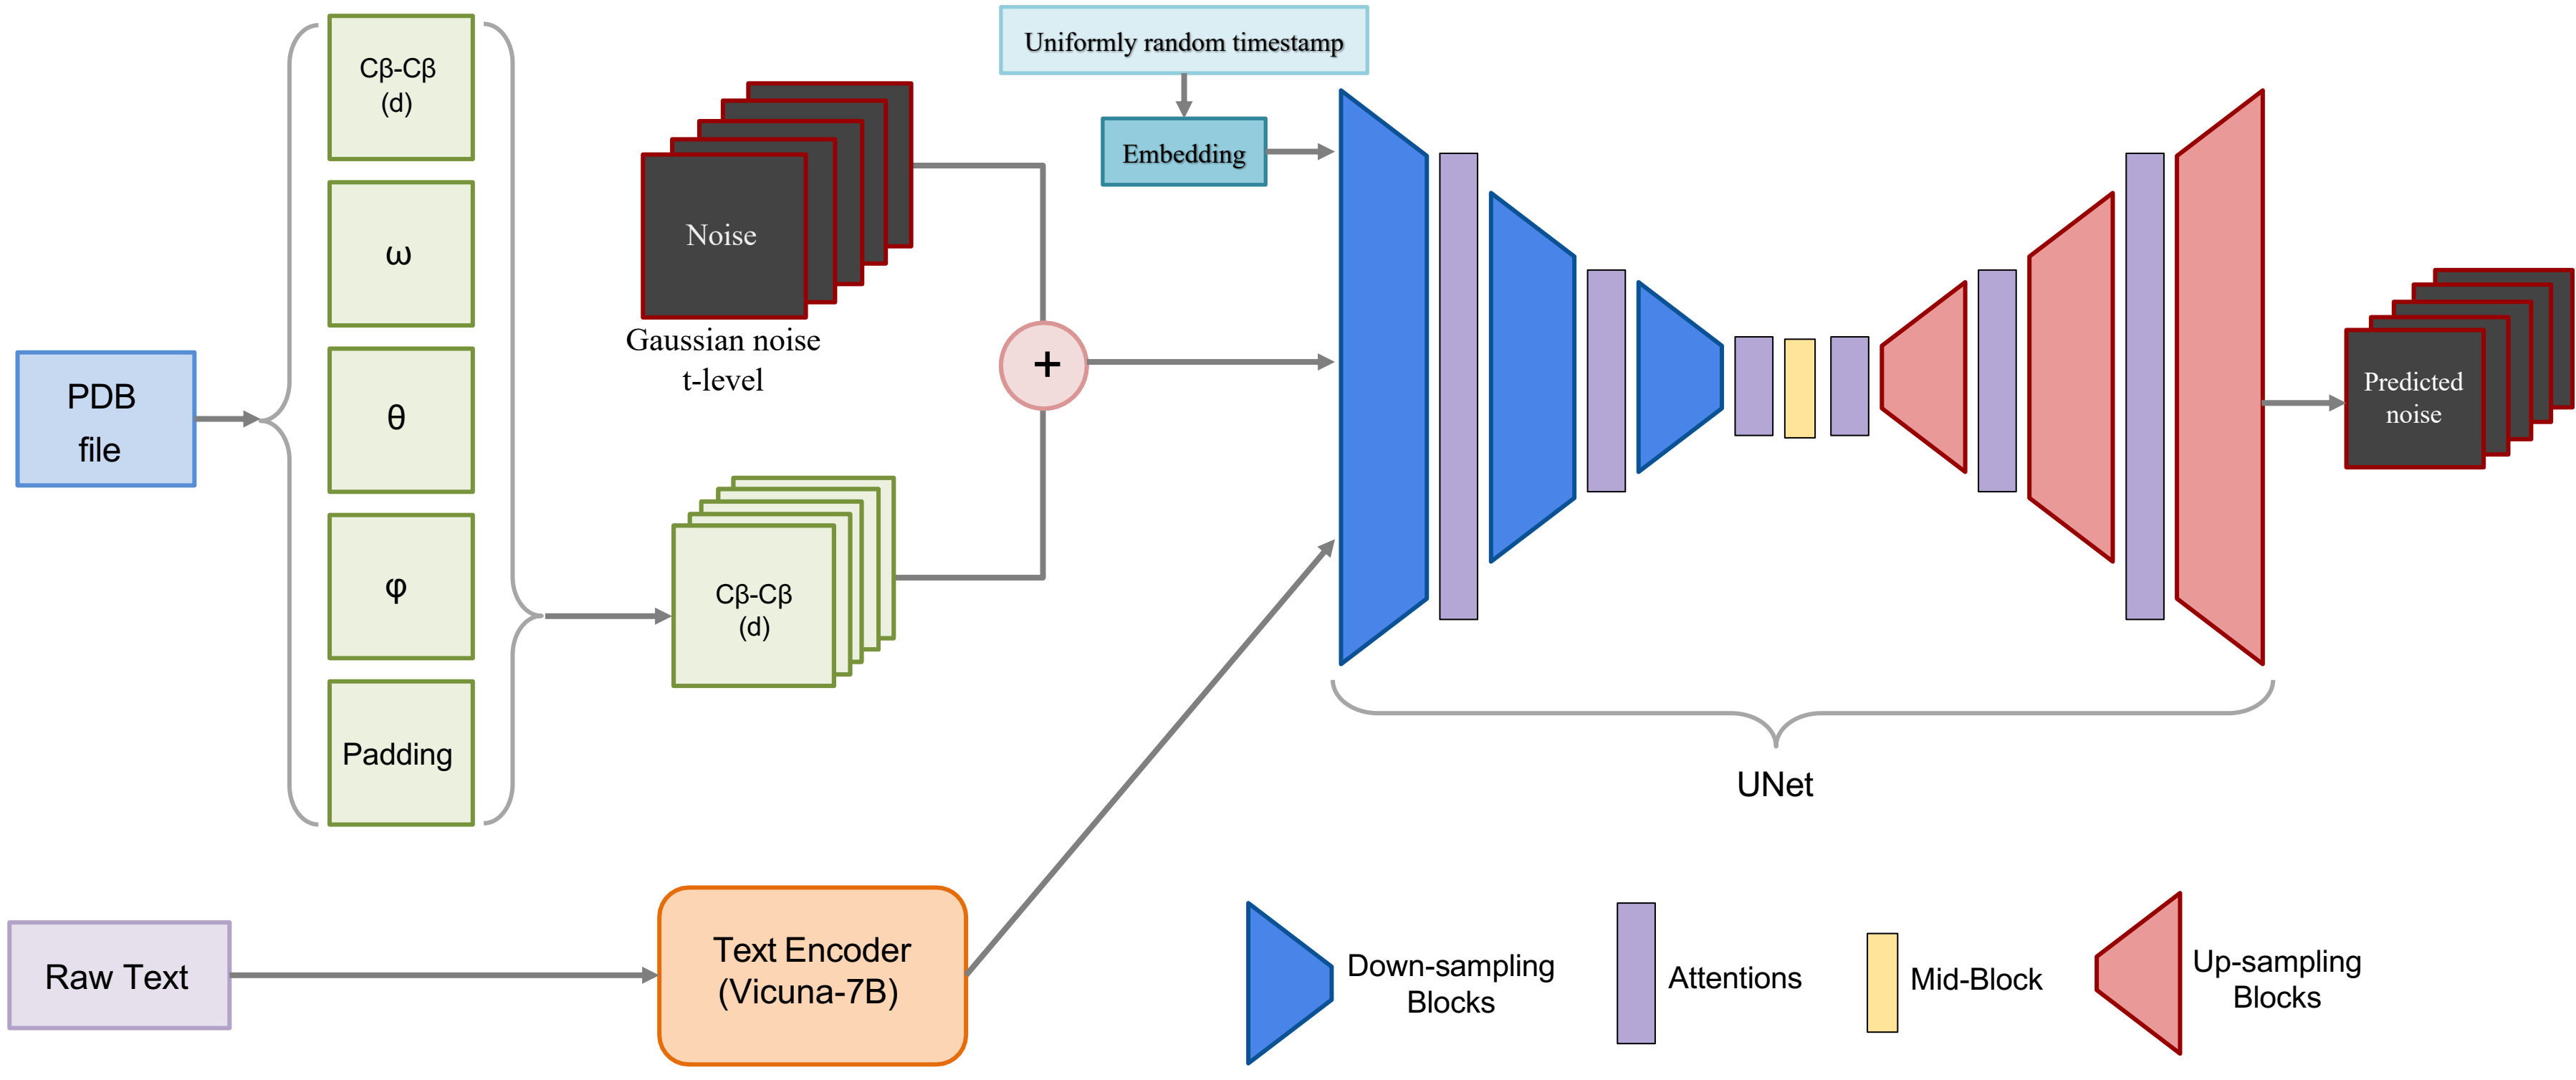

Supplement: Supplementary file 3 [file text2protein_unet3.pdf › LaTex supplementary files/images/text2protein_unet3.pdf]
